# Supplementary material
Source: MDPI journal article supplement (https://www.mdpi.com/2073-4344/12/12/1660)
Supplement: s1 [file s1]

Supplementary materials

# Selective Hydrogenation of 2-Methyl-3-butyn-2-ol in Microcapillary Reactor on Supported Intermetallic PdZn Catalyst, Effect of Support Doping on Stability and Kinetic Parameters

Lyudmila Okhlopkova <sup>1</sup>, Igor Prosvirin <sup>1,\*</sup>, Mikhail Kerzhentsev <sup>1</sup> and Zinfer Ismagilov <sup>1,2</sup>

<sup>1</sup> Borekov Institute of Catalysis SB RAS, Prospekt Akademika Lavrentieva 5, Novosibirsk 630090, Russia

<sup>2</sup> Institute of Coal Chemistry and Material Science, Prospekt Soviet 18, Kemerovo 650000, Russia

\* Correspondence: prosvirin@catalysis.ru; Tel.: +7-3833269774

**Table S1.** Kinetic parameters of the hydrogenation reaction of MBY on films PdZn/TiO<sub>2</sub> after different pretreatments.

| Parameter                             | PdZn/TiO <sub>2</sub> -a | PdZn/TiO <sub>2</sub> -b | PdZn/TiO <sub>2</sub> -c | PdZn/TiO <sub>2</sub> -d |
|---------------------------------------|--------------------------|--------------------------|--------------------------|--------------------------|
| $k_1/\text{mol/L/s/gPd}^1$            | 714                      | 579                      | 1200                     | 920                      |
| $k_2'/\text{mol/L/s/gPd}$             | 132                      | 177                      | 310                      | 1752                     |
| $k_3'/\text{mol/L/s/gPd}$             | 20                       | 1.0                      | 20                       | $5 \times 10^{-6}$       |
| $K_{\text{MBY}} \text{ L/mol}$        | 61                       | 49                       | 45                       | 90                       |
| $K_{\text{MBE}}$                      | 0.8                      | 0.8                      | 0.8                      | 0.8                      |
| $K_{\text{MBA}}$                      | 8                        | 1.8                      | 0.1                      | 0.001                    |
| $K_{\text{MBE}}/K_{\text{MBY}}$       | 0.013                    | 0.016                    | 0.018                    | 0.009                    |
| $K_{\text{MBA}}/K_{\text{MBE}}$       | 10                       | 2.3                      | 0.125                    | $1.3 \times 10^{-3}$     |
| $K_{\text{MBA}}/K_{\text{MBY}}^1$     | 0.13                     | 0.04                     | $2.2 \times 10^{-3}$     | $1.1 \times 10^{-5}$     |
| Max/deviation, %                      | 20                       | 25                       | 16                       | 11                       |
| $Q, \text{g}_{\text{MBE}}/\text{day}$ | 3.6                      | 3.6                      | 3.4                      | 2.8                      |
| $S_{97\%}$                            | 96.7                     | 97.1                     | 97.3                     | 94.8                     |

**Table S2.** Kinetic parameters of the hydrogenation reaction of MBY on films PdZn/Ti<sub>0.8</sub>Zr<sub>0.8</sub>O<sub>2</sub> after different pretreatments.

| Parameter                      | PdZn/Ti <sub>0.8</sub> Zr <sub>0.8</sub> O <sub>2</sub> -a | PdZn/Ti <sub>0.8</sub> Zr <sub>0.8</sub> O <sub>2</sub> -b | PdZn/Ti <sub>0.8</sub> Zr <sub>0.8</sub> O <sub>2</sub> -c | PdZn/Ti <sub>0.8</sub> Zr <sub>0.8</sub> O <sub>2</sub> -d |
|--------------------------------|------------------------------------------------------------|------------------------------------------------------------|------------------------------------------------------------|------------------------------------------------------------|
| $k_1'/\text{mol/L/s/gPd}$      | 788                                                        | 1416                                                       | 1469                                                       | 798                                                        |
| $k_2'/\text{mol/L/s/gPd}$      | 176                                                        | 978                                                        | 1199                                                       | 1291                                                       |
| $k_3'/\text{mol/L/s/gPd}$      | 41                                                         | 8                                                          | 30                                                         | 9                                                          |
| $K_{\text{MBY}} \text{ L/mol}$ | 43                                                         | 16                                                         | 20                                                         | 48                                                         |
| $K_{\text{MBE}}^1$             | 0.6                                                        | 0.6                                                        | 0.6                                                        | 0.6                                                        |
| $K_{\text{MBA}}$               | 0.01                                                       | 0.0001                                                     | 0.0001                                                     | 0.0001                                                     |

<sup>1</sup> Fixed value.

|                     |                      |                      |                      |                      |
|---------------------|----------------------|----------------------|----------------------|----------------------|
| $K_{MBE}/K_{MBY}$   | 0.014                | 0.038                | 0.030                | 0.013                |
| $K_{MBA}/K_{MBE}$   | 0.017                | $1.7 \times 10^{-4}$ | $1.7 \times 10^{-4}$ | $1.7 \times 10^{-4}$ |
| $K_{MBA}/K_{MBY^2}$ | $2.3 \times 10^{-4}$ | $6.3 \times 10^{-6}$ | $5.0 \times 10^{-6}$ | $2.1 \times 10^{-6}$ |
| Max/deviation, %    | 24                   | 19                   | 22                   | 20                   |
| Q, gMBE/day         | 6.3                  | 12.5                 | 4.8                  | 4.6                  |
| $S_{97\%}$ %        | 96.8                 | 93.4                 | 92.3                 | 94.0                 |

**Table S3.** Kinetic parameters of the hydrogenation reaction of MBY on films PdZn/Ti<sub>0.95</sub>Ce<sub>0.05</sub>O<sub>2</sub> after different pretreatments.

| Parameter                       | PdZn/Ti <sub>0.95</sub> Ce <sub>0.05</sub> O <sub>2</sub> -a | PdZn/Ti <sub>0.95</sub> Ce <sub>0.05</sub> O <sub>2</sub> -b | PdZn/Ti <sub>0.95</sub> Ce <sub>0.05</sub> O <sub>2</sub> -c | PdZn/Ti <sub>0.95</sub> Ce <sub>0.05</sub> O <sub>2</sub> -d |
|---------------------------------|--------------------------------------------------------------|--------------------------------------------------------------|--------------------------------------------------------------|--------------------------------------------------------------|
| $k_1'$ /mol/L/s/g <sub>Pd</sub> | 1357                                                         | 1943                                                         | 1537                                                         | 1695                                                         |
| $k_2'$ /mol/L/s/g <sub>Pd</sub> | 1012                                                         | 568                                                          | 296                                                          | 863                                                          |
| $k_3'$ /mol/L/s/g <sub>Pd</sub> | 0.0001                                                       | 20                                                           | 35                                                           | 0.8                                                          |
| $K_{MBY'}$ L/mol                | 32                                                           | 58                                                           | 50                                                           | 62                                                           |
| $K_{MBE}$                       | 1                                                            | 1                                                            | 1                                                            | 1                                                            |
| $K_{MBA}$                       | 0.001                                                        | 0.01                                                         | 0.1                                                          | 0.0001                                                       |
| $K_{MBE}/K_{MBY}$               | 0.031                                                        | 0.017                                                        | 0.02                                                         | 0.016                                                        |
| $K_{MBA}/K_{MBE}$               | 0.001                                                        | 0.01                                                         | 0.1                                                          | 0.0001                                                       |
| $K_{MBA}/K_{MBY^2}$             | $3.1 \times 10^{-5}$                                         | $1.7 \times 10^{-4}$                                         | $1.6 \times 10^{-3}$                                         | $1.6 \times 10^{-6}$                                         |
| Max/deviation, %                | 16                                                           | 25                                                           | 17                                                           | 21                                                           |
| Q, gMBE/day                     | 3.7                                                          | 2.1                                                          | 3.4                                                          | 1.2                                                          |
| $S_{97\%}$ %                    | 93.7                                                         | 97.3                                                         | 96.8                                                         | 97.1                                                         |

**Table S4.** Kinetic parameters of the hydrogenation reaction of MBY on films PdZn/Ti<sub>0.8</sub>Zn<sub>0.2</sub>O<sub>1.7</sub> after different pretreatments.

| Parameter                       | PdZn/Ti <sub>0.8</sub> Zn <sub>0.2</sub> O <sub>1.7</sub> -a | PdZn/Ti <sub>0.8</sub> Zn <sub>0.2</sub> O <sub>1.7</sub> -b | PdZn/Ti <sub>0.8</sub> Zn <sub>0.2</sub> O <sub>1.7</sub> -c | PdZn/Ti <sub>0.8</sub> Zn <sub>0.2</sub> O <sub>1.7</sub> -d |
|---------------------------------|--------------------------------------------------------------|--------------------------------------------------------------|--------------------------------------------------------------|--------------------------------------------------------------|
| $k_1'$ /mol/L/s/g <sub>Pd</sub> | 244                                                          | 919                                                          | 791                                                          | 788                                                          |
| $k_2'$ /mol/L/s/g <sub>Pd</sub> | 24                                                           | 53                                                           | 67                                                           | 151                                                          |
| $k_3'$ /mol/L/s/g <sub>Pd</sub> | 7                                                            | 22                                                           | 6                                                            | 7                                                            |
| $K_{MBY'}$ L/mol                | 52                                                           | 49                                                           | 42                                                           | 48                                                           |
| $K_{MBE}$                       | 0.3                                                          | 0.3                                                          | 0.3                                                          | 0.3                                                          |
| $K_{MBA}$                       | 1                                                            | 0.00016                                                      | 0.001                                                        | 0.0001                                                       |
| $K_{MBE}/K_{MBY}$               | 0.006                                                        | 0.006                                                        | 0.007                                                        | 0.006                                                        |
| $K_{MBA}/K_{MBE}$               | 3.3                                                          | $5 \times 10^{-4}$                                           | $3 \times 10^{-3}$                                           | $3 \times 10^{-4}$                                           |
| $K_{MBA}/K_{MBY^2}$             | 0.02                                                         | $3 \times 10^{-6}$                                           | $2 \times 10^{-5}$                                           | $2 \times 10^{-6}$                                           |
| Max/deviation, %                | 28                                                           | 17                                                           | 15                                                           | 13                                                           |
| Q, gMBE/day                     | 0.42                                                         | 1.3                                                          | 2.5                                                          | 1.0                                                          |
| $S_{97\%}$ %                    | 97.4                                                         | 97.6                                                         | 99.0                                                         | 98.8                                                         |

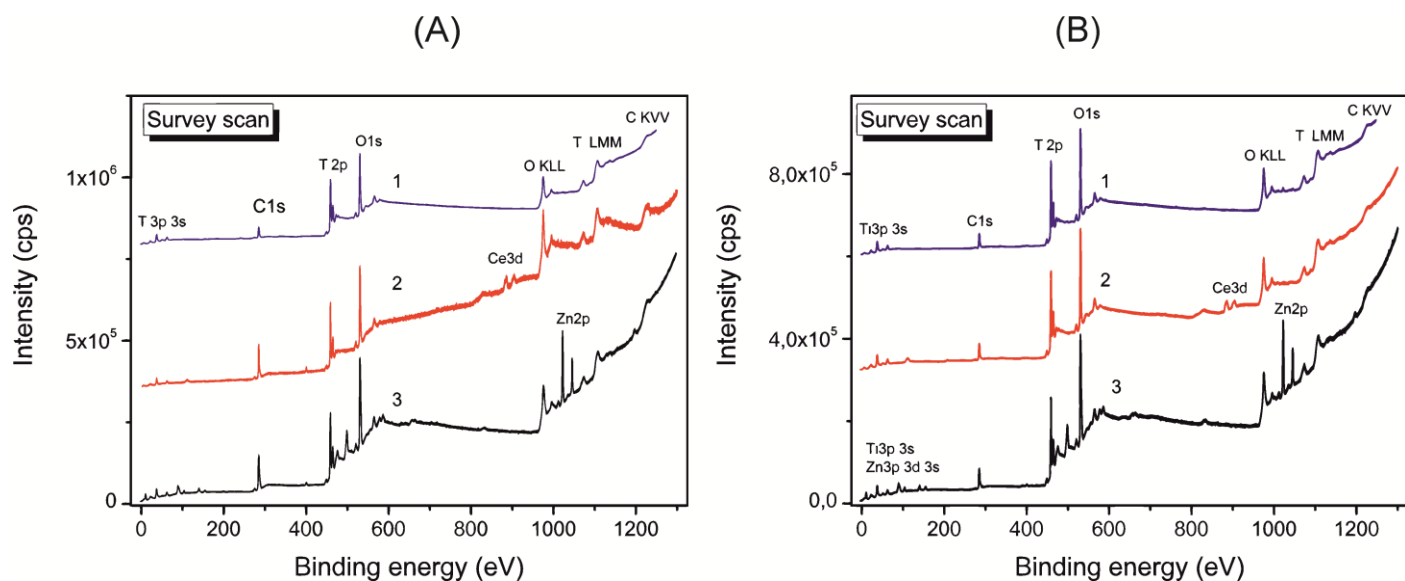

**Figure S1.** Survey spectra of the catalysts after (A) reduction with 30 vol.% hydrogen in argon at 573 K for 2 h and (B) calcination at 573 K in air and reduction with 30 vol.% hydrogen in argon at 573 K for 2 h. PdZn/TiO<sub>2</sub> (1), PdZn/Ti<sub>0.95</sub>Ce<sub>0.05</sub>O<sub>2</sub> (2), PdZn/Ti<sub>0.8</sub>Zn<sub>0.2</sub>O<sub>1.8</sub> (3).

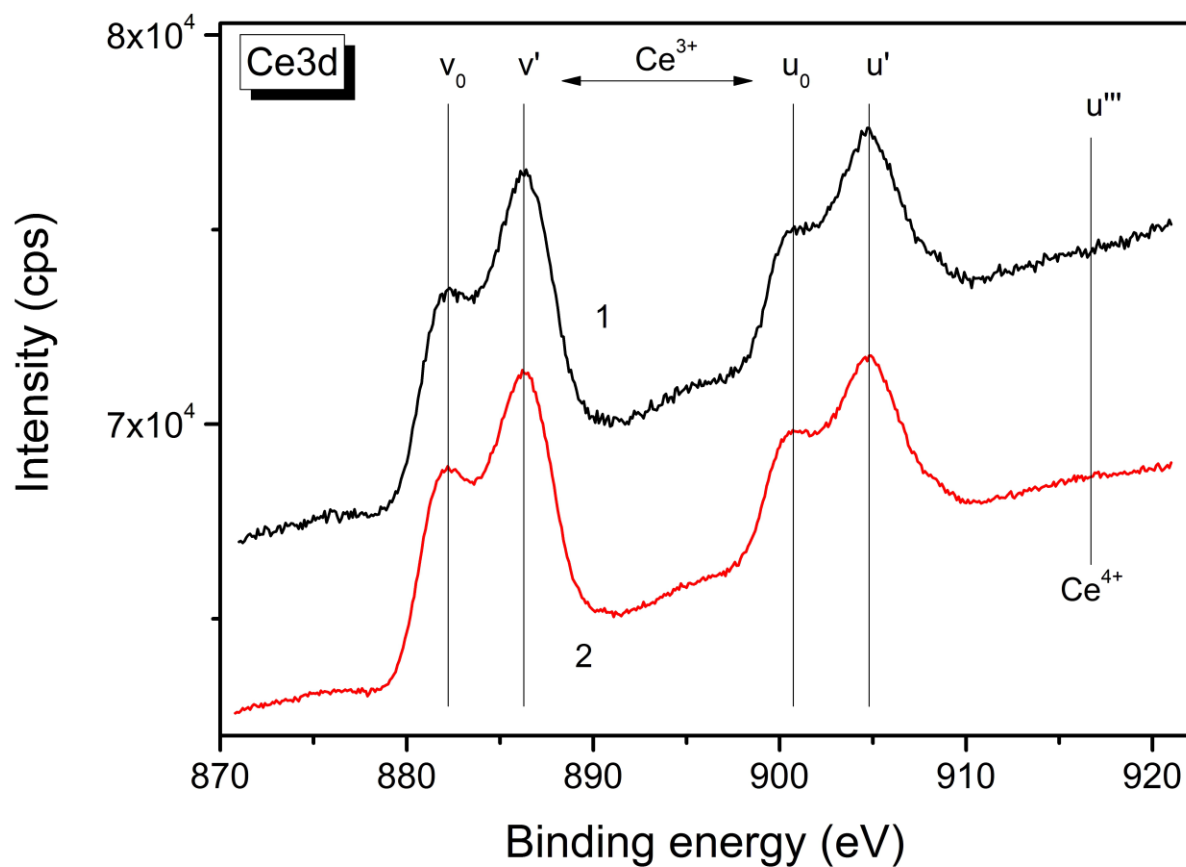

**Figure S2.** Ce3d core-level X-ray photoelectron spectra of PdZn/Ti<sub>0.95</sub>Ce<sub>0.05</sub>O<sub>2</sub> after reduction with 30 vol.% hydrogen in argon at 573 K for 2 h (1) and calcination at 573 K in air and reduction with 30 vol.% hydrogen in argon at 573 K for 2 h (2).

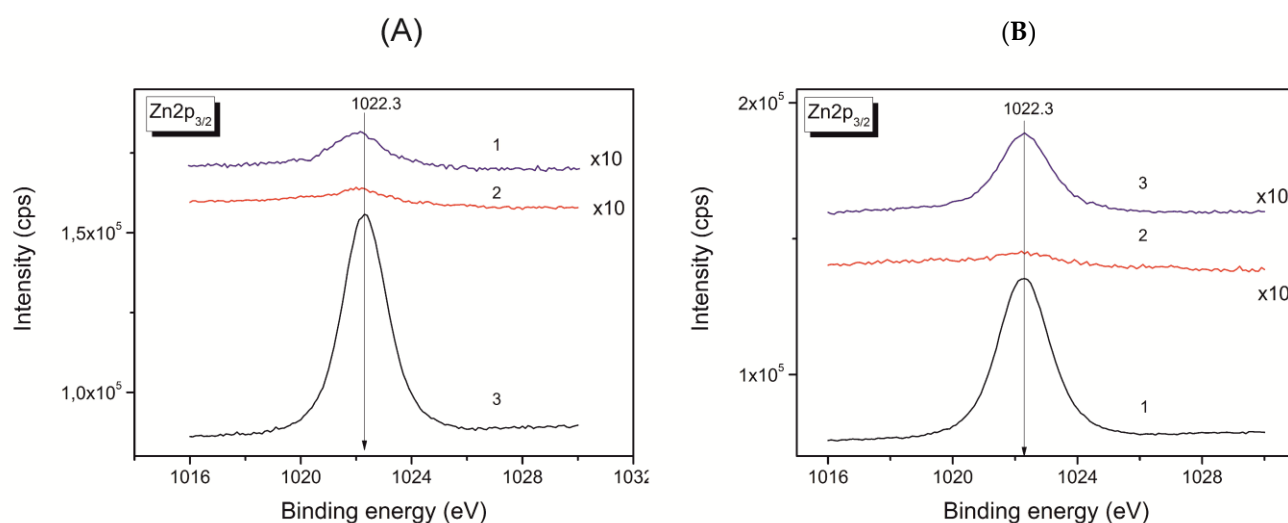

**Figure S3.** Zn 2p<sub>3/2</sub> core-level X-ray photoelectron spectra of PdZn/Ti<sub>0.95</sub>Ce<sub>0.05</sub>O<sub>2</sub> after (A) reduction with 30 vol.% hydrogen in argon at 573 K for 2 h and (B) calcination at 573 K in air and reduction with 30 vol.% hydrogen in argon at 573 K for 2 h. PdZn/TiO<sub>2</sub> (1), PdZn/Ti<sub>0.95</sub>Ce<sub>0.05</sub>O<sub>2</sub> (2), PdZn/Ti<sub>0.8</sub>Zn<sub>0.2</sub>O<sub>1.8</sub> (3).

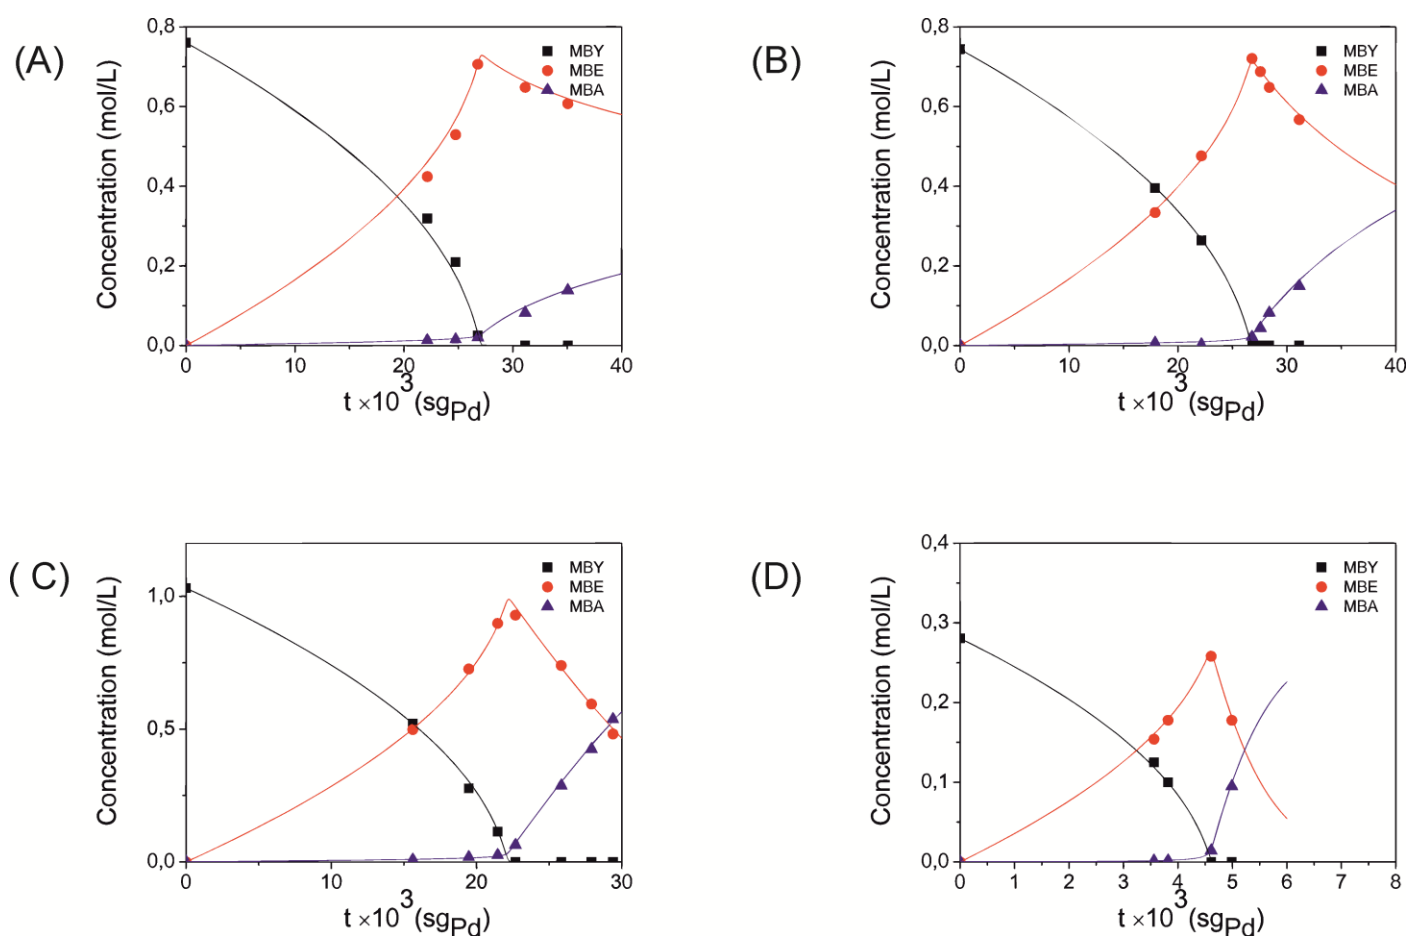

**Figure S4.** Dependences of the concentrations of MBY, MBE and MBA on the contact time after different pretreatments on PdZn/TiO<sub>2</sub>-a (A), PdZn/TiO<sub>2</sub>-b (B), PdZn/TiO<sub>2</sub>-c (C), PdZn/TiO<sub>2</sub>-d (D), points - experiment, lines - calculation by the Langmuir-Hinshelwood model. Reaction conditions: gas flow rate 6.0 mL / min, = 1 atm, T = 313 K.

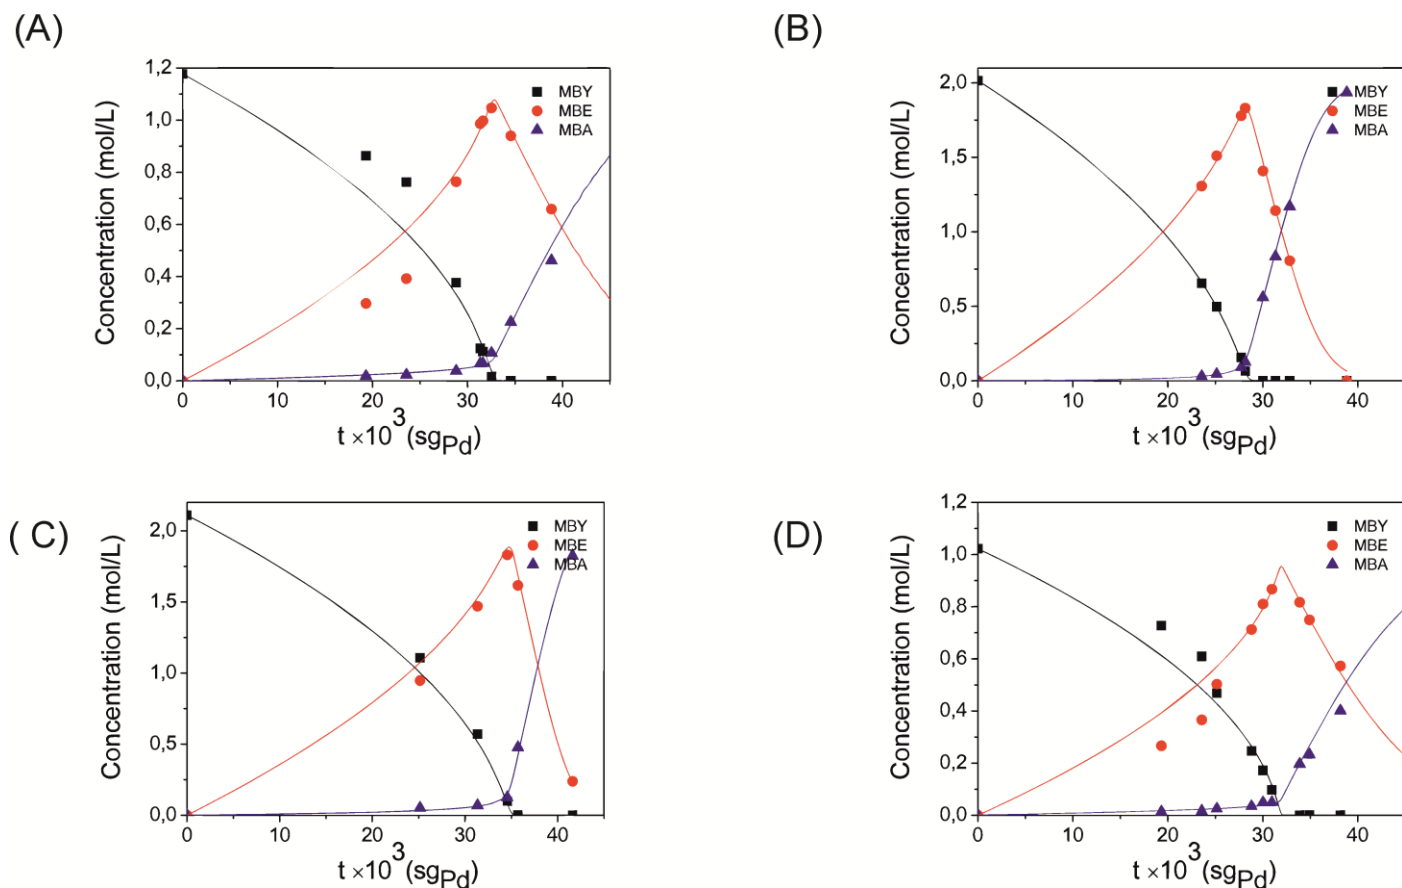

**Figure S5.** Dependences of the concentrations of MBY, MBE and MBA on the contact time after different pretreatments on PdZn/Ti<sub>0.8</sub>Zr<sub>0.8</sub>O<sub>2</sub>-a (A), PdZn/Ti<sub>0.8</sub>Zr<sub>0.8</sub>O<sub>2</sub>-b (B), PdZn/Ti<sub>0.8</sub>Zr<sub>0.8</sub>O<sub>2</sub>-c (C), PdZn/Ti<sub>0.8</sub>Zr<sub>0.8</sub>O<sub>2</sub>-d (D), points - experiment, lines - calculation by the Langmuir-Hinshelwood model. Reaction conditions: gas flow rate 6.0 mL/min, = 1 atm, T = 313 K.

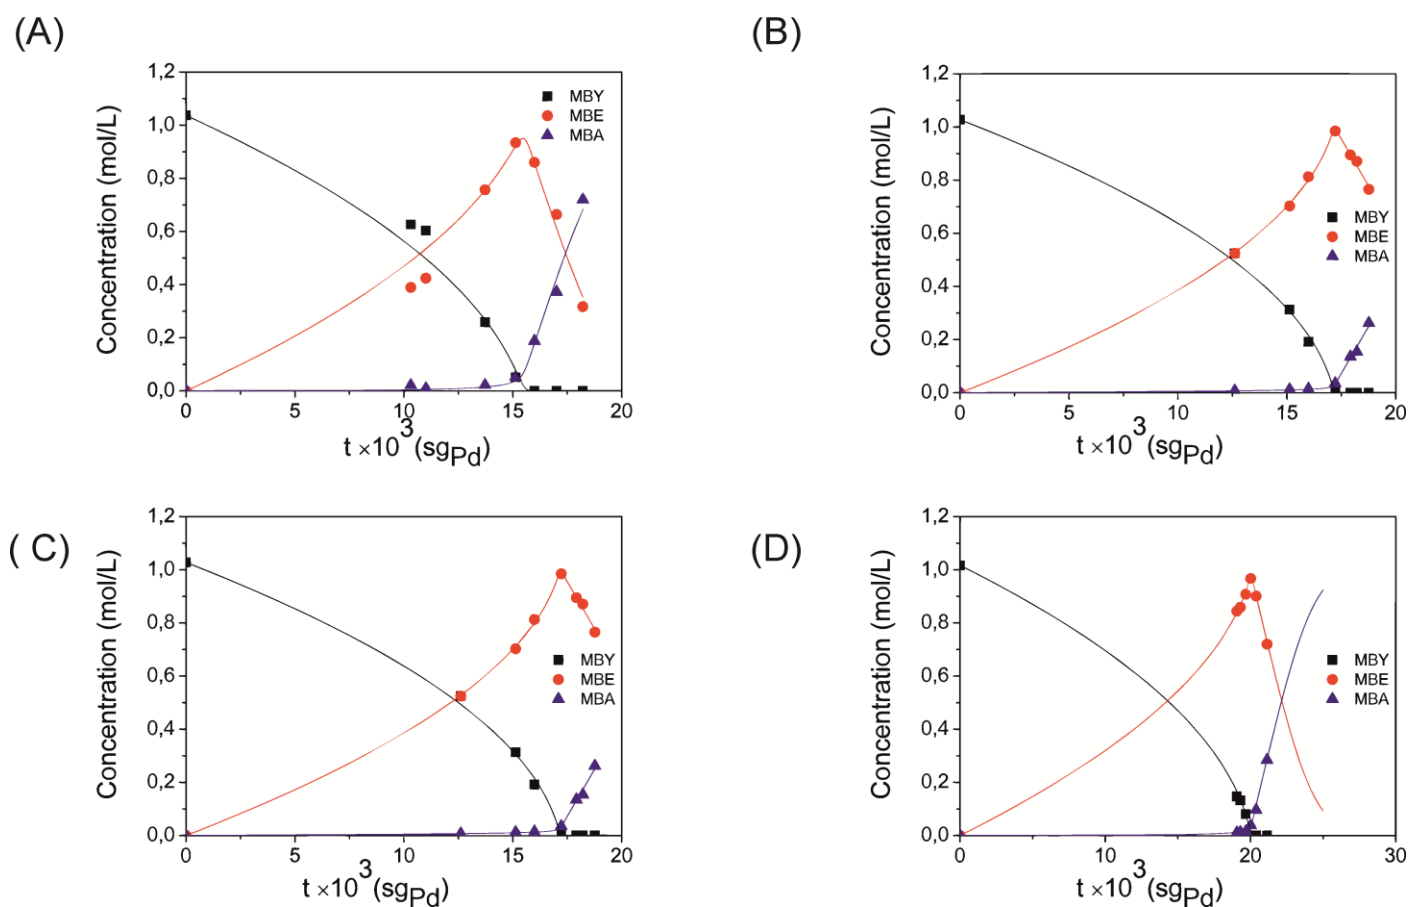

**Figure S6.** Dependences of the concentrations of MBY, MBE and MBA on the contact time after different pretreatments on PdZn/Ti<sub>0.95</sub>Ce<sub>0.05</sub>O<sub>2</sub> -a (A), PdZn/Ti<sub>0.95</sub>Ce<sub>0.05</sub>O<sub>2</sub> -b (B), PdZn/Ti<sub>0.95</sub>Ce<sub>0.05</sub>O<sub>2</sub> -c (C), PdZn/Ti<sub>0.95</sub>Ce<sub>0.05</sub>O<sub>2</sub> -d (D), points - experiment, lines - calculation by the Langmuir-Hinshelwood model. Reaction conditions: gas flow rate 6.0 mL/min, = 1 atm, T = 313 K.

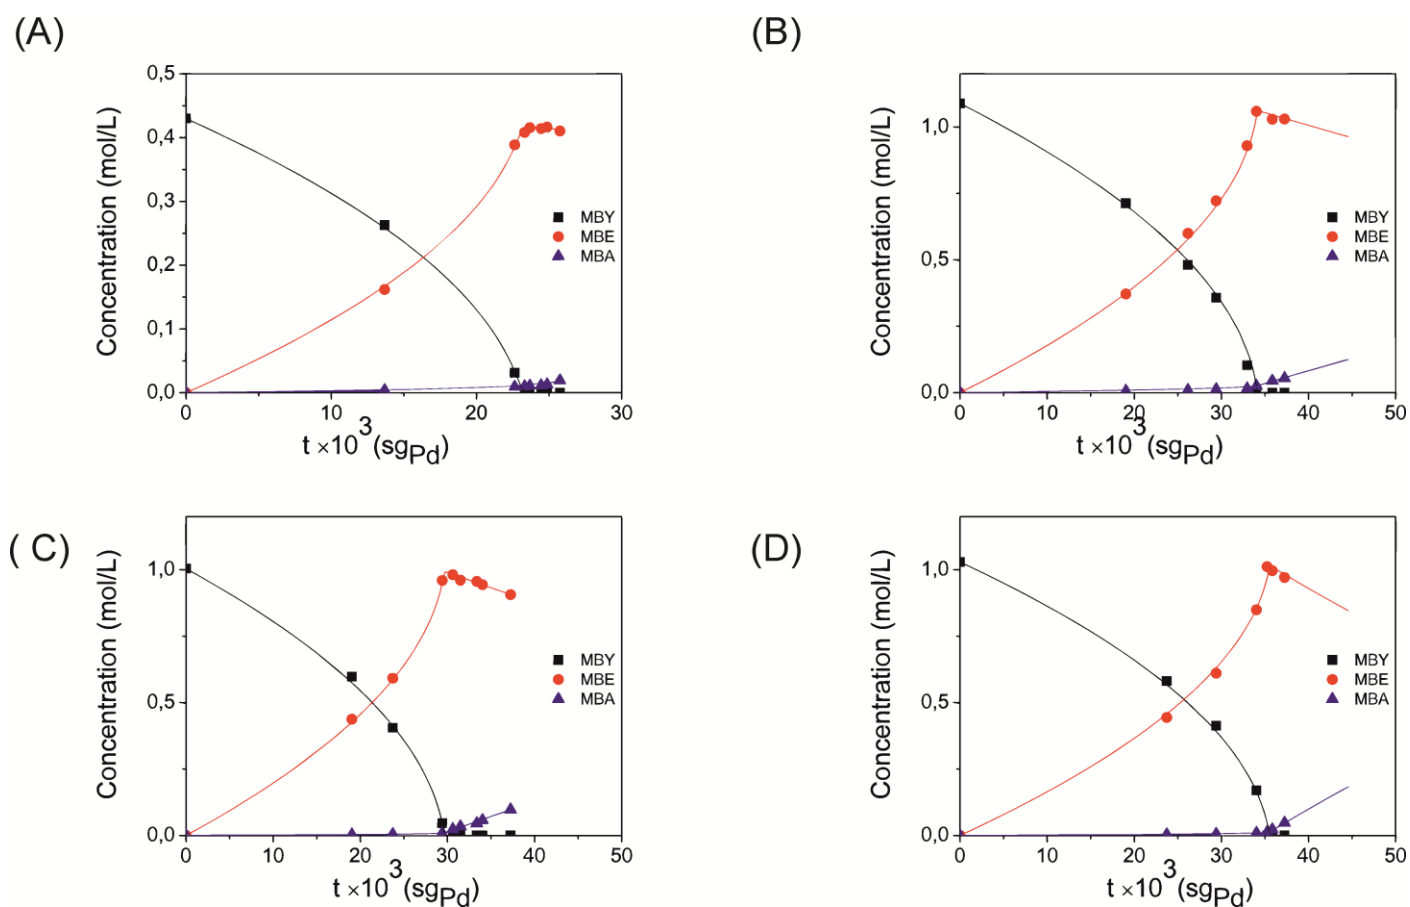

**Figure S7.** Dependences of the concentrations of MBY, MBE and MBA on the contact time after different pretreatments on PdZn/Ti<sub>0.8</sub>Zn<sub>0.2</sub>O<sub>2</sub> -a (A), PdZn/Ti<sub>0.8</sub>Zn<sub>0.2</sub>O<sub>2</sub> -b (B), PdZn/Ti<sub>0.8</sub>Zn<sub>0.2</sub>O<sub>2</sub> -c (C), PdZn/Ti<sub>0.8</sub>Zn<sub>0.2</sub>O<sub>2</sub> -d (D), points - experiment, lines - calculation by the Langmuir-Hinshelwood model. Reaction conditions: gas flow rate 6.0 mL/min, = 1 atm, T = 313 K.

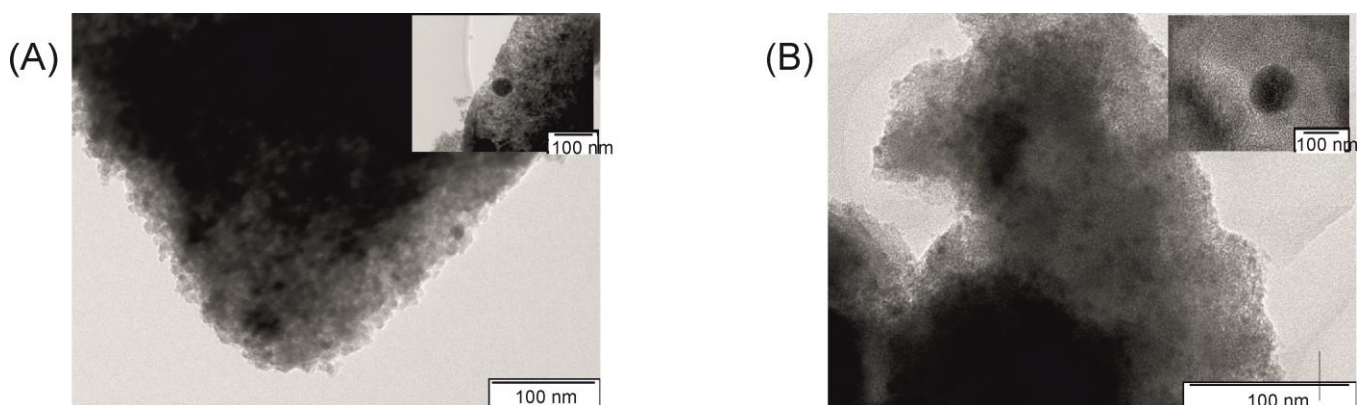

**Figure S8.** TEM micrographs of the powdered catalysts (A) PdZn/TiO<sub>2</sub>-d, (B) PdZn/Ti<sub>0.95</sub>Ce<sub>0.05</sub>O<sub>2</sub>-d.

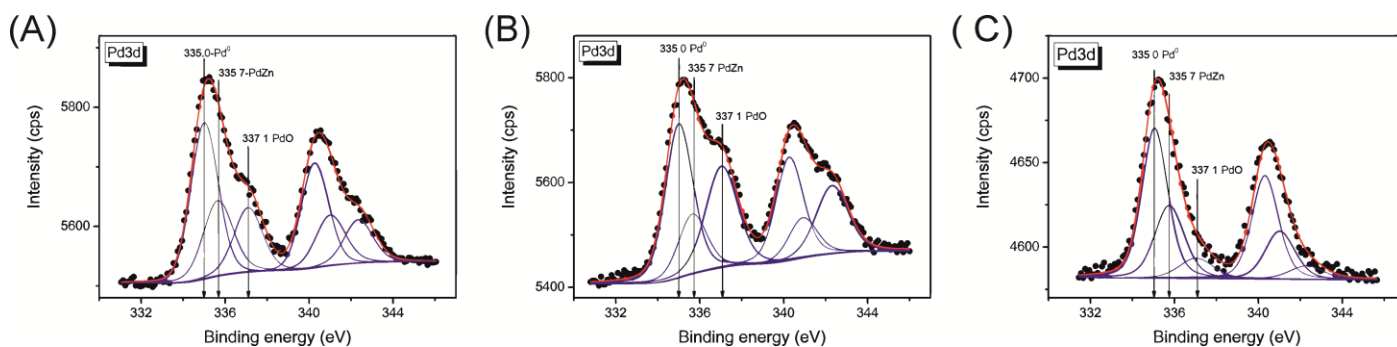

**Figure S9.** Peak fitting of Pd3d<sub>5/2</sub> core-level spectra of (A) PdZn/TiO<sub>2</sub>-d, (B) PdZn/Ti<sub>0.95</sub>Ce<sub>0.05</sub>O<sub>2</sub>-d, and (C) PdZn/Ti<sub>0.8</sub>Zn<sub>0.2</sub>O<sub>1.8</sub>-d after calcination at 573 K in air and reduction with 30 vol.% hydrogen in argon at 573 K for 2 h.
